# Supplementary material for: Cross-Sectional and Longitudinal Associations between Peak Expiratory Flow and Frailty in Older Adults
Source: J Clin Med. 2019 Nov 7;8(11):1901. doi: 10.3390/jcm8111901 (PMC6912606; doi:10.3390/jcm8111901)
Supplement: Supplementary file 1 [file jcm-08-01901-s001.pdf]

## **SUPPLEMENTARY MATERIAL**

### **Appendix 1. Characteristics of the included and excluded study participants at baseline**

Compared to the 2559 individuals included in the cross-sectional analysis, those excluded because of missing data (n=613) were more likely to be older (mean age  $82.8 \pm 10.6$  vs  $71.7 \pm 9.7$  years,  $p < 0.001$ ), to be women (73.6% vs. 61.3%,  $p < 0.001$ ), and to have lower educational level (15.5% vs. 38% university graduates,  $p < 0.001$ ) and cognitive performance (49.8% vs. 12.5% had a Mini-Mental State Examination [MMSE]  $< 28$ ). Moreover, they had worse clinical status (mean number of chronic diseases  $5.4 \pm 2.9$  vs  $3.6 \pm 2.2$ ,  $p < 0.001$ ), with higher prevalence of diagnosed chronic obstructive pulmonary disease (7.7% vs. 4.1%,  $p < 0.001$ ) and cardiovascular diseases (41.1% vs. 19%,  $p < 0.001$ ).

Similarly, compared to the 2026 individuals included in the longitudinal analysis, those excluded from the cross-sectional sample because of missing data or drop-outs (n=320) were more likely to have lower and cognitive performance (13.8% vs. 9.9% had a MMSE  $< 28$ ,  $p = 0.04$ ), but did not show any significant difference on age, sex distribution, number of chronic diseases, prevalence of cardiovascular and of chronic obstructive pulmonary diseases.

**Supplementary Table S1.** Multivariate regression models and predictive equations for peak expiratory flow from a subsample of healthy SNAC-K participants

|                     | <b>Men</b>                                                         |                       | <b>Women</b>                                                       |                       |
|---------------------|--------------------------------------------------------------------|-----------------------|--------------------------------------------------------------------|-----------------------|
|                     | <b>(n=212)</b>                                                     |                       | <b>(n=504)</b>                                                     |                       |
|                     | <b>Coefficient (SE)</b>                                            | <b>Mean (min-max)</b> | <b>Coefficient (SE)</b>                                            | <b>Mean (min-max)</b> |
| Intercept (l/min)   | 254.58 (193.27)                                                    | 537.6 (250.0-780.0)   | 385.78 (97.42)                                                     | 367.5 (35.0-580.0)    |
| Age (years)         | -5.21 (0.71)***                                                    | 69 (60-96)            | -4.93 (0.35)***                                                    | 73 (60-99)            |
| Height (cm)         | 3.63 (1.03)***                                                     | 177 (160-194)         | 2.11 (0.53)***                                                     | 162 (142-180)         |
| Predictive equation | 254.58 – 5.21*Age + 3.63*Height<br>SDR=88.65, R <sup>2</sup> =0.25 |                       | 385.78 - 4.93*Age + 2.11*Height<br>SDR=73.06, R <sup>2</sup> =0.35 |                       |

*Abbreviations:* SE, standard error; SDR, standard deviation of the residuals; R<sup>2</sup>, R-squared.

\*p<0.05; \*\*p<0.01; \*\*\*p<0.001.

**Supplementary Table S2.** Longitudinal association between peak expiratory flow and frailty over a 6-year follow-up in participants free from physical deficits at baseline (n=1435)

|                                           | Odds ratios and 95% Confidence Interval<br>of Frailty |                     |                     |
|-------------------------------------------|-------------------------------------------------------|---------------------|---------------------|
|                                           | n                                                     | Model 1             | Model 2             |
| <b>Peak expiratory flow SR-percentile</b> |                                                       |                     |                     |
| Per each 10 <sup>th</sup> decrease        | 1435                                                  | 1.20 (1.10-2.32)*** | 1.20 (1.09-1.33)*** |
| 80 <sup>th</sup> -100 <sup>th</sup>       | 199                                                   | [ref]               | [ref]               |
| 50 <sup>th</sup> -79 <sup>th</sup>        | 563                                                   | 3.02 (1.22-7.50)*   | 3.06 (1.20-7.78)*   |
| 10 <sup>th</sup> -49 <sup>th</sup>        | 564                                                   | 4.61 (1.88-11.35)** | 4.40 (1.73-11.20)** |
| <10 <sup>th</sup>                         | 109                                                   | 6.70 (2.20-20.43)** | 7.39 (2.29-23.88)** |

*Abbreviations:* SR, standardized residual. Model 1 is adjusted for age, sex (male vs female), educational level (elementary vs high school vs university), and study time (time to frailty/to follow-up/to death, as appropriate). Model 2 is also adjusted for body mass index, smoking habits (never vs former/current), drinking habits (never/occasionally vs moderate/heavy), baseline Mini-Mental State Examination, number of chronic diseases, chronic obstructive pulmonary disease, asthma, cardiovascular diseases, use of bronchodilators (yes vs no).

\*p-value <0.05; \*\*p-value <0.01; \*\*\*p-value <0.001.
